# Supplementary material for: Canine Parvovirus in Turkey: First Whole-Genome Sequences, Strain Distribution, and Prevalence
Source: MDPI journal article supplement (doi:10.3390/v15040957), 2023-04-13
Supplement: s1 [file s1]

**Supplement S2.** Worldwide CPV Genomes and VP2 Gene Sequences from Dogs

| No  | Accession Number | Collection Year | Location     | Strain | Reference                        |
|-----|------------------|-----------------|--------------|--------|----------------------------------|
| 001 | ON733252         | 2021            | Hungary      | 2b     | Miljan, 2017                     |
| 002 | MW653248         | 2021            | Iran         | 2a     | Morovvati et al., 2021           |
| 003 | MW653251         | 2020            | Iran         | 2b     | Morovvati et al., 2021           |
| 004 | MW653253         | 2020            | Iran         | 2c     | Morovvati et al., 2021           |
| 005 | OP093952         | 2019            | Brazil       | 2b     | GenBank (Deus et al., 2022)      |
| 006 | MZ362882         | 2019            | Australia    | 2a     | GenBank (Khabiri et al., 2021)   |
| 007 | MZ362881         | 2019            | Australia    | 2b     | GenBank (Khabiri et al., 2021)   |
| 008 | OM937908         | 2019            | Egypt        | 2c     | Ndiana et al., 2022              |
| 009 | OM937913         | 2019            | Egypt        | 2a     | Ndiana et al., 2022              |
| 010 | OM937914         | 2019            | Egypt        | 2b     | Ndiana et al., 2022              |
| 011 | MW654969         | 2019            | Romania      | 2c     | Balboni et al., 2021             |
| 012 | MT981021         | 2018            | Italy        | 2a     | Schiro et al., 2022              |
| 013 | MT981023         | 2018            | Italy        | 2b     | Schiro et al., 2022              |
| 014 | MT981024         | 2018            | Italy        | 2c     | Schiro et al., 2022              |
| 015 | MK867450         | 2018            | Ireland      | 2b     | GenBank (Daly and Dunham)        |
| 016 | MH545963         | 2018            | India        | 2c     | GenBank (Lancy et al., 2018)     |
| 017 | MK895483         | 2018            | Nigeria      | 2a     | Ogbu et al., 2020                |
| 018 | MK895490         | 2018            | Nigeria      | 2c     | Ogbu et al., 2020                |
| 019 | MH476585         | 2017            | China        | 2c     | Zhuang et al., 2018              |
| 020 | MH476590         | 2017            | China        | 2a     | Zhuang et al., 2018              |
| 021 | MT165692         | 2017            | China        | 2b     | GenBank (Fan et al., 2020)       |
| 022 | MH660909         | 2017            | Mongolia     | 2c     | Temuujin et al., 2019            |
| 023 | OL546608         | 2017            | Iraq         | 2b     | Abas et al., 2022                |
| 024 | OL546613         | 2017            | Iraq         | 2c     | Abas et al., 2022                |
| 025 | OL546614         | 2016            | Iraq         | 2a     | Abas et al., 2022                |
| 026 | MK867453         | 2016            | UK           | 2b     | GenBank (Daly and Dunham)        |
| 027 | LC270892         | 2015            | Japan        | 2b     | Sehata et al., 2017              |
| 028 | KU508691         | 2015            | Australia    | 2c     | Woolford et al., 2017            |
| 029 | KP859574         | 2014            | Croatia      | 2c     | Miljan, 2017                     |
| 030 | LC214970         | 2013            | Vietnam      | 2a     | GenBank (Maeda and Nguyen, 2019) |
| 031 | LC214969         | 2013            | Vietnam      | 2c     | GenBank (Maeda and Nguyen, 2019) |
| 032 | KF539793         | 2012            | Hungary      | 2a     | Boros et al., 2021               |
| 033 | MK867451         | 2012            | UK           | 2a     | GenBank (Daly and Dunham)        |
| 034 | MF177286         | 2011            | Uruguay      | 2c     | GenBank (Grecco et al., 2018)    |
| 035 | MF177280         | 2011            | Ecuador      | 2b     | GenBank (Grecco et al., 2018)    |
| 036 | KM457102         | 2010            | Uruguay      | 2a     | Perez et al., 2014               |
| 037 | HQ602969         | 2010            | South Africa | 2b     | Dogonyaro et al., 2013           |
| 038 | FJ005247         | 2009            | Belgium      | 2c     | Decaro et al., 2009              |
| 039 | MF177227         | 2009            | France       | 2c     | GenBank (Grecco et al., 2018)    |
| 040 | GQ865518         | 2008            | Greece       | 2c     | Ntafis et al., 2010              |
| 041 | FJ005214         | 2006            | Spain        | 2c     | Decaro et al., 2009              |
| 042 | FJ005260         | 1997            | Germany      | 2b     | Decaro et al., 2009              |
| 043 | JN033694         | 1993            | Russia       | 2b     | GenBank (Chausov et al., 2011)   |

\* Samples painted in gray: Whole VP2 gene.

\*\* Samples painted in blue: Genome sequences.
