# Supplementary material for: Canine Parvovirus in Turkey: First Whole-Genome Sequences, Strain Distribution, and Prevalence
Source: MDPI journal article supplement (doi:10.3390/v15040957), 2023-04-13
Supplement: s1 [file s1]

**Supplement S1.** Entire CPV GenBank Accession Numbers from Dogs in Turkey

| No  | Accession Number | Collection Year | Location       | Strain | Reference                              |
|-----|------------------|-----------------|----------------|--------|----------------------------------------|
| 001 | OQ355601         | 2022            | Antalya (1)*   | 2b     | This Study                             |
| 002 | OQ355602         | 2022            | Antalya (2)*   | 2b     | This Study                             |
| 003 | OQ355603         | 2022            | Antalya (3)*   | 2b     | This Study                             |
| 004 | OQ355604         | 2022            | Istanbul (1)*  | 2b     | This Study                             |
| 005 | OQ355605         | 2022            | Istanbul (2)*  | 2b     | This Study                             |
| 006 | OQ355606         | 2022            | Istanbul (3)*  | 2c     | This Study                             |
| 007 | OQ355607         | 2022            | Istanbul (4)*  | 2b     | This Study                             |
| 008 | OQ355608         | 2022            | Kayseri (1)*   | 2a     | This Study                             |
| 009 | OQ355609         | 2022            | Kayseri (2)*   | 2b     | This Study                             |
| 010 | OQ355610         | 2022            | Kayseri (3)*   | 2b     | This Study                             |
| 011 | OQ355611         | 2022            | Kayseri (4)*   | 2b     | This Study                             |
| 012 | OQ355618         | 2022            | Van (1)*       | 2a     | This Study                             |
| 013 | OQ355619         | 2022            | Van (2)*       | 2b     | This Study                             |
| 014 | OQ355622         | 2022            | Yozgat (15)*   | 2b     | This Study                             |
| 015 | OQ366402         | 2021            | Ankara (2)     | 2b     | This Study                             |
| 016 | OQ355596         | 2021            | Ankara (3)*    | 2b     | This Study                             |
| 017 | OQ355597         | 2021            | Ankara (4)*    | 2b     | This Study                             |
| 018 | OQ355598         | 2021            | Ankara (5)*    | 2b     | This Study                             |
| 019 | OQ355599         | 2021            | Ankara (7)*    | 2a     | This Study                             |
| 020 | OQ355600         | 2021            | Ankara (8)*    | 2a     | This Study                             |
| 021 | OQ355612         | 2021            | Samsun (1)*    | 2b     | This Study                             |
| 022 | OQ366403         | 2021            | Samsun (3)*    | 2b     | This Study                             |
| 023 | OQ355613         | 2021            | Samsun (5)*    | 2a     | This Study                             |
| 024 | OQ355614         | 2021            | Samsun (6)*    | 2a     | This Study                             |
| 025 | OQ355615         | 2021            | Sanliurfa (1)* | 2b     | This Study                             |
| 026 | OQ355616         | 2021            | Sanliurfa (2)* | 2b     | This Study                             |
| 027 | OQ366404         | 2021            | Sanliurfa (3)* | 2b     | This Study                             |
| 028 | OQ355617         | 2021            | Sanliurfa (4)* | 2b     | This Study                             |
| 029 | OQ355620         | 2021            | Yozgat (6)*    | 2b     | This Study                             |
| 030 | OQ355621         | 2021            | Yozgat (7)*    | 2b     | This Study                             |
| 031 | OM502014         | 2021            | Burdur         | 2b     | GenBank (Hasircioglu, 2022)            |
| 032 | OM721656         | 2021            | Kayseri        | 2b     | Abayli et al., 2022                    |
| 033 | OM747857         | 2021            | Elazig         | 2b     | Abayli et al., 2022                    |
| 034 | OM747858         | 2021            | Elazig         | 2b     | Abayli et al., 2022                    |
| 035 | OM747859         | 2021            | Elazig         | 2b     | Abayli et al., 2022                    |
| 036 | OQ366405         | 2020            | Izmir (2)*     | 2b     | This Study                             |
| 037 | MW539053         | 2020            | Izmir (1)*     | 2b     | This Study                             |
| 038 | MW465343         | 2020            | Konya          | 2b     | GenBank (Dik et al., 2021)             |
| 039 | MW465344         | 2020            | Konya          | 2b     | GenBank (Dik et al., 2021)             |
| 040 | MW465345         | 2020            | Konya          | 2b     | GenBank (Dik et al., 2021)             |
| 041 | MW465346         | 2020            | Konya          | 2b     | GenBank (Dik et al., 2021)             |
| 042 | MZ197813         | 2020            | Balikesir      | 2a     | GenBank (Karapinar and Timurkan, 2021) |

Continue...

| No  | Accession Number | Collection Year | Location  | Strain | Reference                              |
|-----|------------------|-----------------|-----------|--------|----------------------------------------|
| 043 | MZ197814         | 2020            | Balikesir | 2a     | GenBank (Karapinar and Timurkan, 2021) |
| 044 | MZ197815         | 2020            | Balikesir | 2a     | GenBank (Karapinar and Timurkan, 2021) |
| 045 | MZ197816         | 2020            | Balikesir | 2a     | GenBank (Karapinar and Timurkan, 2021) |
| 046 | MZ197817         | 2020            | Balikesir | 2a     | GenBank (Karapinar and Timurkan, 2021) |
| 047 | MZ197818         | 2020            | Balikesir | 2a     | GenBank (Karapinar and Timurkan, 2021) |
| 048 | MZ197819         | 2020            | Balikesir | 2b     | GenBank (Karapinar and Timurkan, 2021) |
| 049 | MZ197820         | 2020            | Balikesir | 2b     | GenBank (Karapinar and Timurkan, 2021) |
| 050 | MZ197821         | 2020            | Balikesir | 2b     | GenBank (Karapinar and Timurkan, 2021) |
| 051 | MZ197822         | 2020            | Balikesir | 2b     | GenBank (Karapinar and Timurkan, 2021) |
| 052 | MZ197823         | 2020            | Balikesir | 2b     | GenBank (Karapinar and Timurkan, 2021) |
| 053 | MZ197824         | 2020            | Balikesir | 2b     | GenBank (Karapinar and Timurkan, 2021) |
| 054 | MZ197825         | 2020            | Balikesir | 2b     | GenBank (Karapinar and Timurkan, 2021) |
| 055 | MZ197826         | 2020            | Balikesir | 2b     | GenBank (Karapinar and Timurkan, 2021) |
| 056 | MZ197827         | 2020            | Balikesir | 2b     | GenBank (Karapinar and Timurkan, 2021) |
| 057 | MZ391098         | 2020            | Ankara    | 2a     | GenBank (Kizilkoca and Tan, 2021)      |
| 058 | MZ391099         | 2020            | Ankara    | 2b     | GenBank (Kizilkoca and Tan, 2021)      |
| 059 | MZ391100         | 2020            | Ankara    | 2a     | GenBank (Kizilkoca and Tan, 2021)      |
| 060 | MZ391101         | 2020            | Ankara    | 2c     | GenBank (Kizilkoca and Tan, 2021)      |
| 061 | MZ545656         | 2020            | Burdur    | 2b     | Hasircioglu, 2023                      |
| 062 | MZ545657         | 2020            | Burdur    | 2b     | Hasircioglu, 2023                      |
| 063 | MZ545658         | 2020            | Burdur    | 2b     | Hasircioglu, 2023                      |
| 064 | MZ545659         | 2020            | Burdur    | 2b     | Hasircioglu, 2023                      |
| 065 | MZ545660         | 2020            | Burdur    | 2b     | Hasircioglu, 2023                      |
| 066 | MZ545661         | 2020            | Burdur    | 2b     | Hasircioglu, 2023                      |
| 067 | MZ545662         | 2020            | Burdur    | 2b     | Hasircioglu, 2023                      |
| 068 | MZ545663         | 2020            | Burdur    | 2b     | Hasircioglu, 2023                      |
| 069 | MZ545664         | 2020            | Burdur    | 2b     | Hasircioglu, 2023                      |
| 070 | MZ545665         | 2020            | Burdur    | 2b     | Hasircioglu, 2023                      |
| 071 | MZ545666         | 2020            | Burdur    | 2b     | Hasircioglu, 2023                      |
| 072 | MZ545667         | 2020            | Burdur    | 2b     | Hasircioglu, 2023                      |
| 073 | MZ545668         | 2020            | Burdur    | 2b     | Hasircioglu, 2023                      |
| 074 | MZ545669         | 2020            | Burdur    | 2b     | Hasircioglu, 2023                      |
| 075 | MZ545670         | 2020            | Burdur    | 2b     | Hasircioglu, 2023                      |
| 076 | OM747853         | 2020            | Elazig    | 2b     | Abayli et al., 2022                    |
| 077 | OM747854         | 2020            | Elazig    | 2b     | Abayli et al., 2022                    |
| 078 | OM747855         | 2020            | Elazig    | 2b     | Abayli et al., 2022                    |
| 079 | OM747856         | 2020            | Ankara    | 2b     | Abayli et al., 2022                    |
| 080 | OM721655         | 2019            | Elazig    | 2b     | Abayli et al., 2022                    |
| 081 | OM747852         | 2019            | Elazig    | 2b     | Abayli et al., 2022                    |
| 082 | MK248872         | 2018            | Ankara    | 2b     | Akkutay-Yoldar and Koc, 2020           |
| 083 | MK248873         | 2018            | Ankara    | 2b     | Akkutay-Yoldar and Koc, 2020           |
| 084 | MK248874         | 2018            | Ankara    | 2b     | Akkutay-Yoldar and Koc, 2020           |
| 085 | MK248875         | 2018            | Ankara    | 2b     | Akkutay-Yoldar and Koc, 2020           |
| 086 | MK248876         | 2018            | Ankara    | 2b     | Akkutay-Yoldar and Koc, 2020           |

Continue...

| No  | Accession Number | Collection Year | Location  | Strain | Reference                      |
|-----|------------------|-----------------|-----------|--------|--------------------------------|
| 087 | MK248877         | 2018            | Ankara    | 2b     | Akkutay-Yoldar and Koc, 2020   |
| 088 | MK248878         | 2018            | Ankara    | 2b     | Akkutay-Yoldar and Koc, 2020   |
| 089 | MN171410         | 2018            | Sivas     | 2b     | Isidan and Turan, 2021         |
| 090 | MN171411         | 2018            | Sivas     | 2b     | Isidan and Turan, 2021         |
| 091 | MN171412         | 2018            | Sivas     | 2b     | Isidan and Turan, 2021         |
| 092 | MN171413         | 2018            | Sivas     | 2b     | Isidan and Turan, 2021         |
| 093 | MN171414         | 2018            | Sivas     | 2b     | Isidan and Turan, 2021         |
| 094 | MN171415         | 2018            | Sivas     | 2b     | Isidan and Turan, 2021         |
| 095 | MN171416         | 2018            | Sivas     | 2b     | Isidan and Turan, 2021         |
| 096 | MN171417         | 2018            | Sivas     | 2b     | Isidan and Turan, 2021         |
| 097 | MN171418         | 2018            | Sivas     | 2b     | Isidan and Turan, 2021         |
| 098 | MN171419         | 2018            | Sivas     | 2b     | Isidan and Turan, 2021         |
| 099 | MG780275         | 2017            | Sanliurfa | 2b     | Polat et al., 2019             |
| 100 | MG780276         | 2017            | Sanliurfa | 2b     | Polat et al., 2019             |
| 101 | MG780277         | 2017            | Sanliurfa | 2b     | Polat et al., 2019             |
| 102 | MG780278         | 2017            | Sanliurfa | 2b     | Polat et al., 2019             |
| 103 | MG780279         | 2017            | Sanliurfa | 2b     | Polat et al., 2019             |
| 104 | MG780280         | 2017            | Sanliurfa | 2b     | Polat et al., 2019             |
| 105 | MG780281         | 2017            | Sanliurfa | 2b     | Polat et al., 2019             |
| 106 | MG780282         | 2017            | Sanliurfa | 2c     | Polat et al., 2019             |
| 107 | MG780283         | 2017            | Sanliurfa | 2b     | Polat et al., 2019             |
| 108 | MG780284         | 2017            | Sanliurfa | 2b     | Polat et al., 2019             |
| 109 | MG780285         | 2017            | Sanliurfa | 2b     | Polat et al., 2019             |
| 110 | MG780286         | 2017            | Sanliurfa | 2b     | Polat et al., 2019             |
| 111 | MG780287         | 2017            | Sanliurfa | 2b     | Polat et al., 2019             |
| 112 | MG780288         | 2017            | Sanliurfa | 2a     | Polat et al., 2019             |
| 113 | MG780289         | 2017            | Sanliurfa | 2b     | Polat et al., 2019             |
| 114 | MG780290         | 2017            | Sanliurfa | 2b     | Polat et al., 2019             |
| 115 | MG780291         | 2017            | Sanliurfa | 2b     | Polat et al., 2019             |
| 116 | MG780292         | 2017            | Sanliurfa | 2b     | Polat et al., 2019             |
| 117 | MT952855         | 2016            | Aydin     | 2b     | GenBank (Saltik and Koc, 2020) |
| 118 | MT952856         | 2016            | Aydin     | 2b     | GenBank (Saltik and Koc, 2020) |
| 119 | MT952857         | 2016            | Aydin     | 2b     | GenBank (Saltik and Koc, 2020) |
| 120 | MT952858         | 2016            | Aydin     | 2b     | GenBank (Saltik and Koc, 2020) |
| 121 | MT952859         | 2016            | Aydin     | 2b     | GenBank (Saltik and Koc, 2020) |
| 122 | MW685563         | 2016            | Konya     | 2a     | Dik et al., 2022               |
| 123 | MW685564         | 2016            | Konya     | 2a     | Dik et al., 2022               |
| 124 | MW685565         | 2016            | Konya     | 2a     | Dik et al., 2022               |
| 125 | MW685566         | 2016            | Konya     | 2b     | Dik et al., 2022               |
| 126 | MW685567         | 2016            | Konya     | 2b     | Dik et al., 2022               |
| 127 | MW685568         | 2016            | Konya     | 2b     | Dik et al., 2022               |
| 128 | MW685569         | 2016            | Konya     | 2a     | Dik et al., 2022               |
| 129 | MW685570         | 2016            | Konya     | 2b     | Dik et al., 2022               |
| 130 | KU310544         | 2015            | Van       | 2a     | GenBank (Karapinar, 2015)      |

Continue...

| No  | Accession Number | Collection Year | Location | Strain | Reference                   |
|-----|------------------|-----------------|----------|--------|-----------------------------|
| 131 | MG545537         | 2014            | Van      | 2a     | Karapinar et al., 2018      |
| 132 | MG545538         | 2014            | Van      | 2b     | Karapinar et al., 2018      |
| 133 | MG545539         | 2014            | Van      | 2b     | Karapinar et al., 2018      |
| 134 | MG545540         | 2014            | Van      | 2b     | Karapinar et al., 2018      |
| 135 | KX268105         | 2013            | Ankara   | 2b     | Gargari, 2015               |
| 136 | KX268106         | 2013            | Ankara   | 2b     | Gargari, 2015               |
| 137 | KX268107         | 2013            | Ankara   | 2b     | Gargari, 2015               |
| 138 | KX268108         | 2013            | Ankara   | 2a     | Gargari, 2015               |
| 139 | KX268109         | 2013            | Ankara   | 2c     | Gargari, 2015               |
| 140 | KX268110         | 2013            | Ankara   | 2a     | Gargari, 2015               |
| 141 | KX268111         | 2013            | Ankara   | 2b     | Gargari, 2015               |
| 142 | KX268112         | 2013            | Ankara   | 2a     | Gargari, 2015               |
| 143 | KX268113         | 2013            | Ankara   | 2a     | Gargari, 2015               |
| 144 | KX268114         | 2013            | Ankara   | 2a     | Gargari, 2015               |
| 145 | KX268115         | 2013            | Ankara   | 2a     | Gargari, 2015               |
| 146 | KX268116         | 2013            | Ankara   | 2b     | Gargari, 2015               |
| 147 | KX268117         | 2013            | Ankara   | 2b     | Gargari, 2015               |
| 148 | KX268118         | 2013            | Ankara   | 2b     | Gargari, 2015               |
| 149 | KX268119         | 2013            | Ankara   | 2a     | Gargari, 2015               |
| 150 | KF500484         | 2009 - 2010     | Ankara   | 2a     | Timurkan and Oguzoglu, 2015 |
| 151 | KF500485         | 2009 - 2010     | Ankara   | 2a     | Timurkan and Oguzoglu, 2015 |
| 152 | KF500486         | 2009 - 2010     | Ankara   | 2a     | Timurkan and Oguzoglu, 2015 |
| 153 | KF500487         | 2009 - 2010     | Ankara   | 2a     | Timurkan and Oguzoglu, 2015 |
| 154 | KF500488         | 2009 - 2010     | Ankara   | 2a     | Timurkan and Oguzoglu, 2015 |
| 155 | KF500489         | 2009 - 2010     | Ankara   | 2a     | Timurkan and Oguzoglu, 2015 |
| 156 | KF500490         | 2009 - 2010     | Ankara   | 2a     | Timurkan and Oguzoglu, 2015 |
| 157 | KF500491         | 2009 - 2010     | Ankara   | 2b     | Timurkan and Oguzoglu, 2015 |
| 158 | KF500492         | 2009 - 2010     | Ankara   | 2b     | Timurkan and Oguzoglu, 2015 |
| 159 | KF500493         | 2009 - 2010     | Ankara   | 2a     | Timurkan and Oguzoglu, 2015 |
| 160 | KF500494         | 2009 - 2010     | Ankara   | 2a     | Timurkan and Oguzoglu, 2015 |
| 161 | KF500495         | 2009 - 2010     | Ankara   | 2b     | Timurkan and Oguzoglu, 2015 |
| 162 | KF500496         | 2009 - 2010     | Ankara   | 2b     | Timurkan and Oguzoglu, 2015 |
| 163 | KF500497         | 2009 - 2010     | Ankara   | 2a     | Timurkan and Oguzoglu, 2015 |
| 164 | KF500498         | 2009 - 2010     | Ankara   | 2a     | Timurkan and Oguzoglu, 2015 |
| 165 | KF500499         | 2009 - 2010     | Ankara   | 2b     | Timurkan and Oguzoglu, 2015 |
| 166 | KF500500         | 2009 - 2010     | Ankara   | 2b     | Timurkan and Oguzoglu, 2015 |
| 167 | KF500501         | 2009 - 2010     | Ankara   | 2a     | Timurkan and Oguzoglu, 2015 |
| 168 | KF500502         | 2009 - 2010     | Ankara   | 2a     | Timurkan and Oguzoglu, 2015 |
| 169 | KF500503         | 2009 - 2010     | Ankara   | 2a     | Timurkan and Oguzoglu, 2015 |
| 170 | KF500504         | 2009 - 2010     | Ankara   | 2b     | Timurkan and Oguzoglu, 2015 |
| 171 | KF500505         | 2009 - 2010     | Ankara   | 2b     | Timurkan and Oguzoglu, 2015 |
| 172 | KF500506         | 2009 - 2010     | Ankara   | 2a     | Timurkan and Oguzoglu, 2015 |
| 173 | KF500507         | 2009 - 2010     | Ankara   | 2a     | Timurkan and Oguzoglu, 2015 |
| 174 | KF500508         | 2009 - 2010     | Ankara   | 2a     | Timurkan and Oguzoglu, 2015 |

Continue...

\* Numbers represents the isolates.

\*\* Samples painted in gray: Partial VP2 gene presented in this study.

\*\*\* Samples painted in blue: Genome sequences presented in this study.

\*\*\*\* Samples painted in yellow were not fit to 426<sup>th</sup> amino acid in alignment, thus the strains written in article was accepted.

\*\*\*\*\*MK503182, MK503183, MK503184, MK503185 sequences were not in the list because of their different location in the VP2 gene region.
