# Supplementary material for: Canine Parvovirus in Turkey: First Whole-Genome Sequences, Strain Distribution, and Prevalence
Source: MDPI journal article supplement (doi:10.3390/v15040957), 2023-04-13
Supplement: s1 [file s1]

**Supplement S5.** CPV Whole-Genome Nucleotide Variations

| Nucleotide Variations  |      |      |      |      |      |      |      |      |      |      |      |      |      |      |      |      |
|------------------------|------|------|------|------|------|------|------|------|------|------|------|------|------|------|------|------|
| Nucleotide Numbers     | 49   | 50   | 51   | 52   | 74   | 79   | 95   | 96   | 97   | 98   | 143  | 262  | 268  | 269  | 270  | 271  |
| NC001539_Ref           | -    | -    | C    | C    | A    | -    | C    | -    | T    | C    | A    | C    | A    | A    | C    | C    |
| OQ366402_Ankara2_2b    | G    | C    | G    | C    | C    | T    | C    | A    | T    | A    | A    | T    | -    | -    | -    | -    |
| MW539053_İzmir1_2b     | C    | G    | C    | G    | A    | -    | T    | A    | G    | A    | G    | T    | -    | -    | -    | -    |
| OQ366405_İzmir2_2b     | C    | G    | C    | G    | A    | -    | C    | -    | T    | C    | A    | T    | -    | -    | -    | -    |
| OQ366403_Samsun3_2b    | G    | C    | G    | C    | C    | T    | C    | A    | T    | A    | A    | T    | -    | -    | -    | -    |
| OQ366404_Sanliurfa3_2b | G    | C    | G    | C    | C    | T    | C    | A    | T    | A    | A    | T    | -    | -    | -    | -    |
| Nucleotide Variations  |      |      |      |      |      |      |      |      |      |      |      |      |      |      |      |      |
| Nucleotide Numbers     | 320  | 440  | 596  | 614  | 617  | 774  | 932  | 1004 | 1018 | 1166 | 1253 | 1553 | 1559 | 1568 | 1580 | 1604 |
| NC001539_Ref           | T    | A    | A    | A    | T    | T    | T    | T    | T    | A    | T    | A    | A    | A    | T    | T    |
| OQ366402_Ankara2_2b    | C    | G    | G    | G    | C    | T    | C    | C    | T    | A    | T    | A    | A    | A    | T    | T    |
| MW539053_İzmir1_2b     | T    | G    | A    | A    | T    | C    | T    | T    | T    | G    | T    | A    | A    | A    | C    | T    |
| OQ366405_İzmir2_2b     | C    | G    | G    | G    | C    | T    | C    | C    | T    | A    | T    | T    | A    | A    | T    | T    |
| OQ366403_Samsun3_2b    | T    | G    | G    | G    | C    | T    | T    | T    | C    | A    | T    | A    | A    | A    | T    | T    |
| OQ366404_Sanliurfa3_2b | C    | G    | G    | G    | C    | T    | C    | C    | T    | A    | C    | A    | G    | T    | T    | C    |
| Nucleotide Variations  |      |      |      |      |      |      |      |      |      |      |      |      |      |      |      |      |
| Nucleotide Numbers     | 1652 | 1655 | 1754 | 1811 | 1875 | 1893 | 1904 | 1949 | 1955 | 2002 | 2011 | 2020 | 2022 | 2027 | 2058 | 2065 |
| NC001539_Ref           | T    | T    | G    | G    | T    | G    | T    | A    | A    | C    | G    | T    | G    | A    | C    | T    |
| OQ366402_Ankara2_2b    | T    | C    | G    | G    | T    | G    | T    | A    | C    | C    | G    | C    | A    | G    | C    | T    |
| MW539053_İzmir1_2b     | C    | T    | G    | A    | T    | G    | C    | G    | A    | C    | G    | T    | G    | G    | C    | C    |
| OQ366405_İzmir2_2b     | T    | C    | G    | G    | T    | A    | T    | A    | C    | C    | G    | C    | A    | A    | C    | T    |
| OQ366403_Samsun3_2b    | T    | T    | G    | G    | C    | G    | T    | A    | C    | T    | G    | T    | G    | A    | G    | T    |
| OQ366404_Sanliurfa3_2b | C    | T    | A    | G    | T    | G    | T    | A    | C    | C    | A    | C    | A    | G    | C    | T    |

Continue...

| Nucleotide Variations  |      |      |      |      |      |      |      |      |      |      |      |      |      |      |      |      |
|------------------------|------|------|------|------|------|------|------|------|------|------|------|------|------|------|------|------|
| Nucleotide Numbers     | 2198 | 2240 | 2292 | 2576 | 2707 | 2765 | 2909 | 2920 | 2936 | 2947 | 2991 | 3048 | 3068 | 3091 | 3092 | 3173 |
| NC001539_Ref           | G    | T    | G    | G    | A    | A    | T    | C    | G    | T    | C    | A    | C    | T    | T    | A    |
| OQ366402_Ankara2_2b    | A    | C    | C    | G    | A    | A    | T    | C    | A    | T    | C    | T    | C    | C    | T    | A    |
| MW539053_İzmir1_2b     | A    | T    | G    | G    | G    | A    | T    | C    | A    | T    | C    | T    | C    | C    | C    | A    |
| OQ366405_İzmir2_2b     | A    | C    | C    | A    | A    | C    | T    | C    | A    | T    | C    | T    | C    | C    | T    | A    |
| OQ366403_Samsun3_2b    | A    | C    | C    | G    | A    | A    | G    | G    | A    | G    | T    | T    | T    | C    | T    | A    |
| OQ366404_Sanlıurfa3_2b | A    | C    | C    | G    | G    | A    | T    | C    | A    | T    | C    | T    | C    | C    | T    | G    |
| Nucleotide Variations  |      |      |      |      |      |      |      |      |      |      |      |      |      |      |      |      |
| Nucleotide Numbers     | 3194 | 3215 | 3323 | 3377 | 3386 | 3521 | 3545 | 3583 | 3589 | 3678 | 3688 | 3702 | 3737 | 3759 | 3760 | 3764 |
| NC001539_Ref           | G    | A    | T    | T    | A    | T    | A    | C    | T    | T    | C    | G    | A    | T    | A    | T    |
| OQ366402_Ankara2_2b    | G    | A    | C    | C    | A    | C    | G    | C    | A    | G    | G    | T    | G    | A    | T    | T    |
| MW539053_İzmir1_2b     | G    | A    | C    | T    | A    | C    | G    | C    | A    | G    | G    | T    | G    | A    | T    | T    |
| OQ366405_İzmir2_2b     | G    | A    | C    | T    | A    | C    | G    | C    | A    | G    | G    | T    | G    | A    | T    | T    |
| OQ366403_Samsun3_2b    | A    | A    | C    | T    | C    | T    | A    | C    | T    | G    | G    | T    | G    | A    | T    | T    |
| OQ366404_Sanlıurfa3_2b | G    | G    | C    | T    | A    | C    | G    | T    | A    | G    | G    | T    | G    | G    | T    | C    |
| Nucleotide Variations  |      |      |      |      |      |      |      |      |      |      |      |      |      |      |      |      |
| Nucleotide Numbers     | 3888 | 4064 | 4065 | 4107 | 4124 | 4145 | 4262 | 4448 | 4511 | 4557 | 4577 | 4593 | 4607 | 4619 | 4624 | 4627 |
| NC001539_Ref           | T    | G    | A    | A    | T    | T    | A    | T    | A    | G    | A    | A    | T    | G    | T    | T    |
| OQ366402_Ankara2_2b    | G    | A    | G    | G    | C    | T    | A    | C    | A    | -    | C    | -    | C    | -    | T    | T    |
| MW539053_İzmir1_2b     | G    | A    | G    | G    | C    | T    | A    | C    | A    | G    | A    | A    | T    | G    | G    | T    |
| OQ366405_İzmir2_2b     | G    | A    | G    | G    | C    | T    | G    | C    | A    | G    | A    | A    | T    | G    | G    | T    |
| OQ366403_Samsun3_2b    | G    | A    | G    | G    | C    | A    | A    | C    | A    | -    | A    | A    | C    | T    | -    | A    |
| OQ366404_Sanlıurfa3_2b | G    | A    | G    | G    | C    | T    | A    | C    | G    | -    | C    | -    | C    | -    | T    | T    |

Continue...

| Nucleotide Variations  |      |      |      |      |      |      |      |      |      |      |      |      |      |      |      |      |
|------------------------|------|------|------|------|------|------|------|------|------|------|------|------|------|------|------|------|
| Nucleotide Numbers     | 4629 | 4633 | 4660 | 4687 | 4706 | 4715 | 4768 | 4776 | 4777 | 4793 | 4795 | 4807 | 4808 | 4810 | 4811 | 4812 |
| NC001539_Ref           | T    | T    | -    | T    | -    | G    | G    | A    | G    | T    | T    | G    | A    | C    | -    | -    |
| OQ366402_Ankara2_2b    | T    | T    | T    | C    | G    | T    | G    | A    | G    | A    | C    | A    | T    | T    | T    | G    |
| MW539053_İzmir1_2b     | T    | T    | T    | C    | G    | T    | -    | A    | G    | T    | T    | G    | A    | C    | -    | -    |
| OQ366405_İzmir2_2b     | T    | T    | T    | C    | G    | T    | -    | A    | G    | T    | T    | G    | A    | C    | -    | -    |
| OQ366403_Samsun3_2b    | G    | A    | T    | C    | G    | T    | G    | A    | G    | T    | T    | A    | T    | T    | T    | G    |
| OQ366404_Sanlıurfa3_2b | T    | T    | T    | C    | G    | T    | G    | T    | T    | T    | T    | A    | T    | T    | T    | G    |
| Nucleotide Variations  |      |      |      |      |      |      |      |      |      |      |      |      |      |      |      |      |
| Nucleotide Numbers     | 4813 | 4814 | 4815 | 4816 | 4817 | 4818 | 4819 | 4820 | 4821 | 4824 | 4826 | 4829 | 4830 | 4831 | 4833 | 4838 |
| NC001539_Ref           | -    | -    | -    | -    | -    | -    | -    | -    | A    | T    | G    | C    | A    | T    | G    | T    |
| OQ366402_Ankara2_2b    | T    | A    | C    | T    | T    | G    | T    | A    | C    | G    | T    | A    | G    | G    | T    | A    |
| MW539053_İzmir1_2b     | -    | -    | -    | -    | -    | -    | -    | -    | A    | T    | G    | C    | A    | T    | G    | T    |
| OQ366405_İzmir2_2b     | -    | -    | -    | -    | -    | -    | -    | -    | A    | T    | G    | C    | A    | T    | G    | T    |
| OQ366403_Samsun3_2b    | T    | A    | C    | T    | T    | G    | T    | A    | T    | G    | T    | A    | G    | G    | T    | A    |
| OQ366404_Sanlıurfa3_2b | T    | A    | C    | T    | T    | G    | T    | A    | C    | G    | T    | A    | G    | G    | T    | A    |
| Nucleotide Variations  |      |      |      |      |      |      |      |      |      |      |      |      |      |      |      |      |
| Nucleotide Numbers     | 4885 | 4904 | 4914 | 4916 | 4919 | 4968 | 5077 | 5080 | 5081 | 5082 | 5088 | 5234 | 5297 |      |      |      |
| NC001539_Ref           | T    | T    | A    | A    | T    | T    | G    | G    | C    | -    | A    | T    | A    |      |      |      |
| OQ366402_Ankara2_2b    | T    | T    | A    | A    | T    | T    | T    | A    | A    | G    | A    | C    | A    |      |      |      |
| MW539053_İzmir1_2b     | A    | G    | A    | A    | T    | T    | G    | G    | C    | -    | A    | C    | A    |      |      |      |
| OQ366405_İzmir2_2b     | A    | G    | A    | A    | T    | T    | G    | G    | C    | -    | A    | C    | A    |      |      |      |
| OQ366403_Samsun3_2b    | T    | T    | A    | A    | C    | T    | T    | A    | A    | G    | A    | C    | A    |      |      |      |
| OQ366404_Sanlıurfa3_2b | T    | T    | T    | T    | T    | A    | T    | A    | A    | G    | G    | C    | G    |      |      |      |

\* The gray-shaded nucleotides are different to the reference
