# Supplementary figures and images for: Canine Parvovirus in Turkey: First Whole-Genome Sequences, Strain Distribution, and Prevalence
Source: MDPI journal article supplement (doi:10.3390/v15040957), 2023-04-13

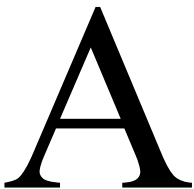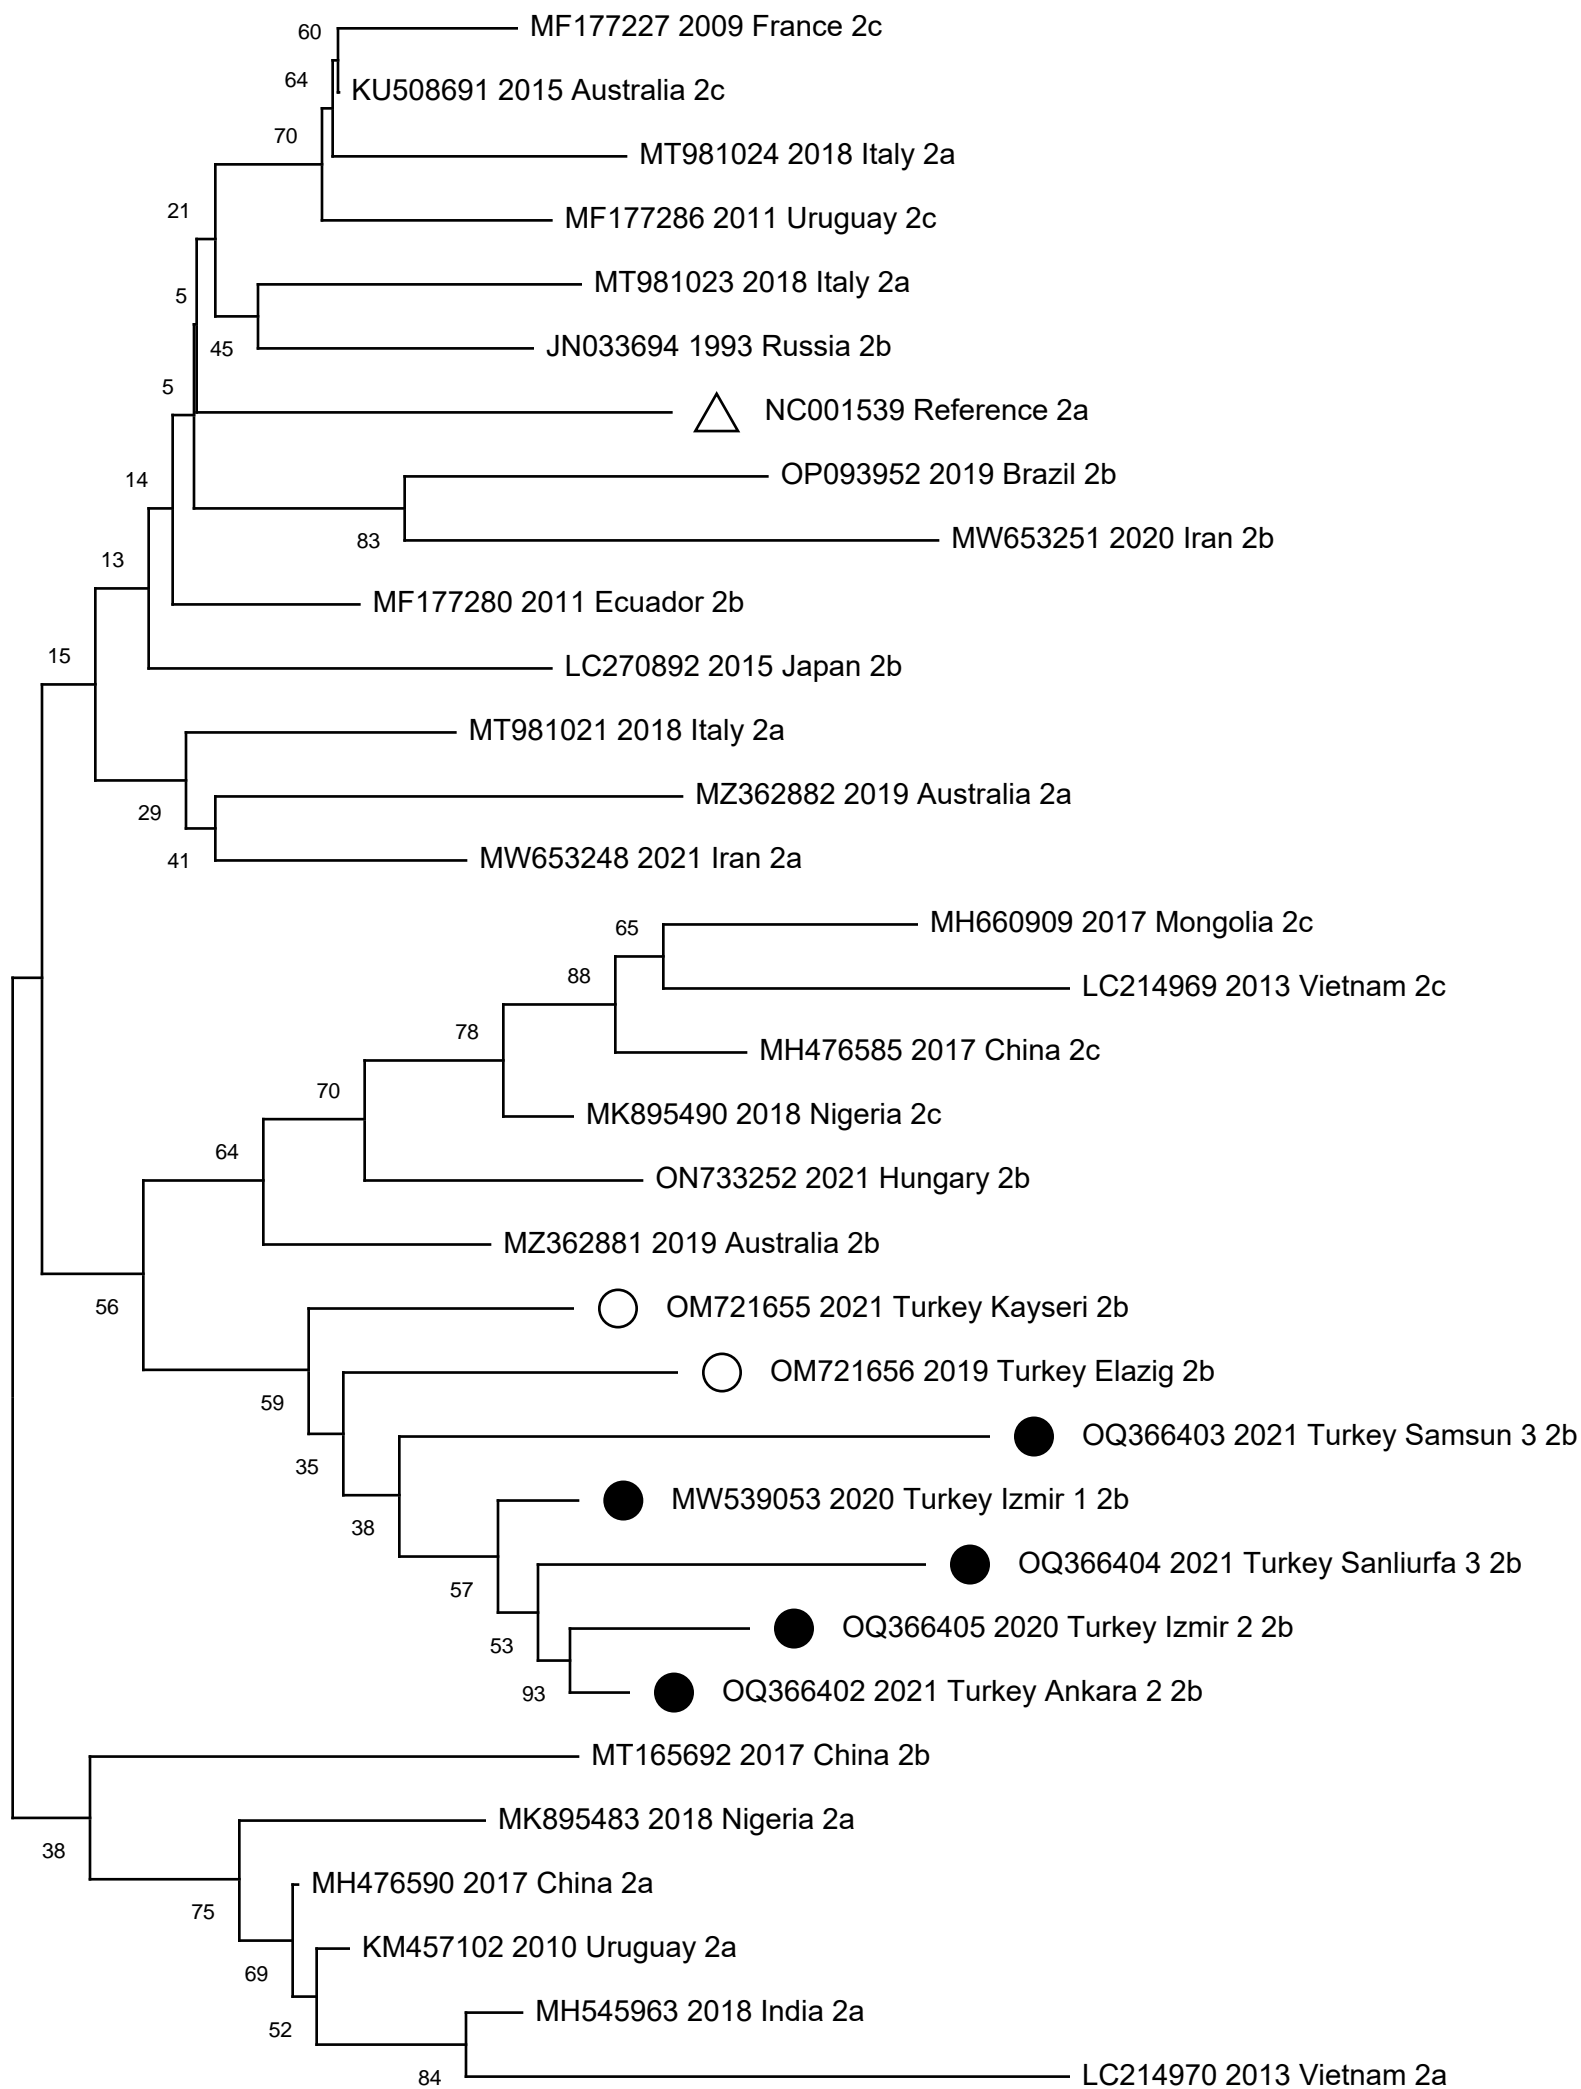

0.0020

B

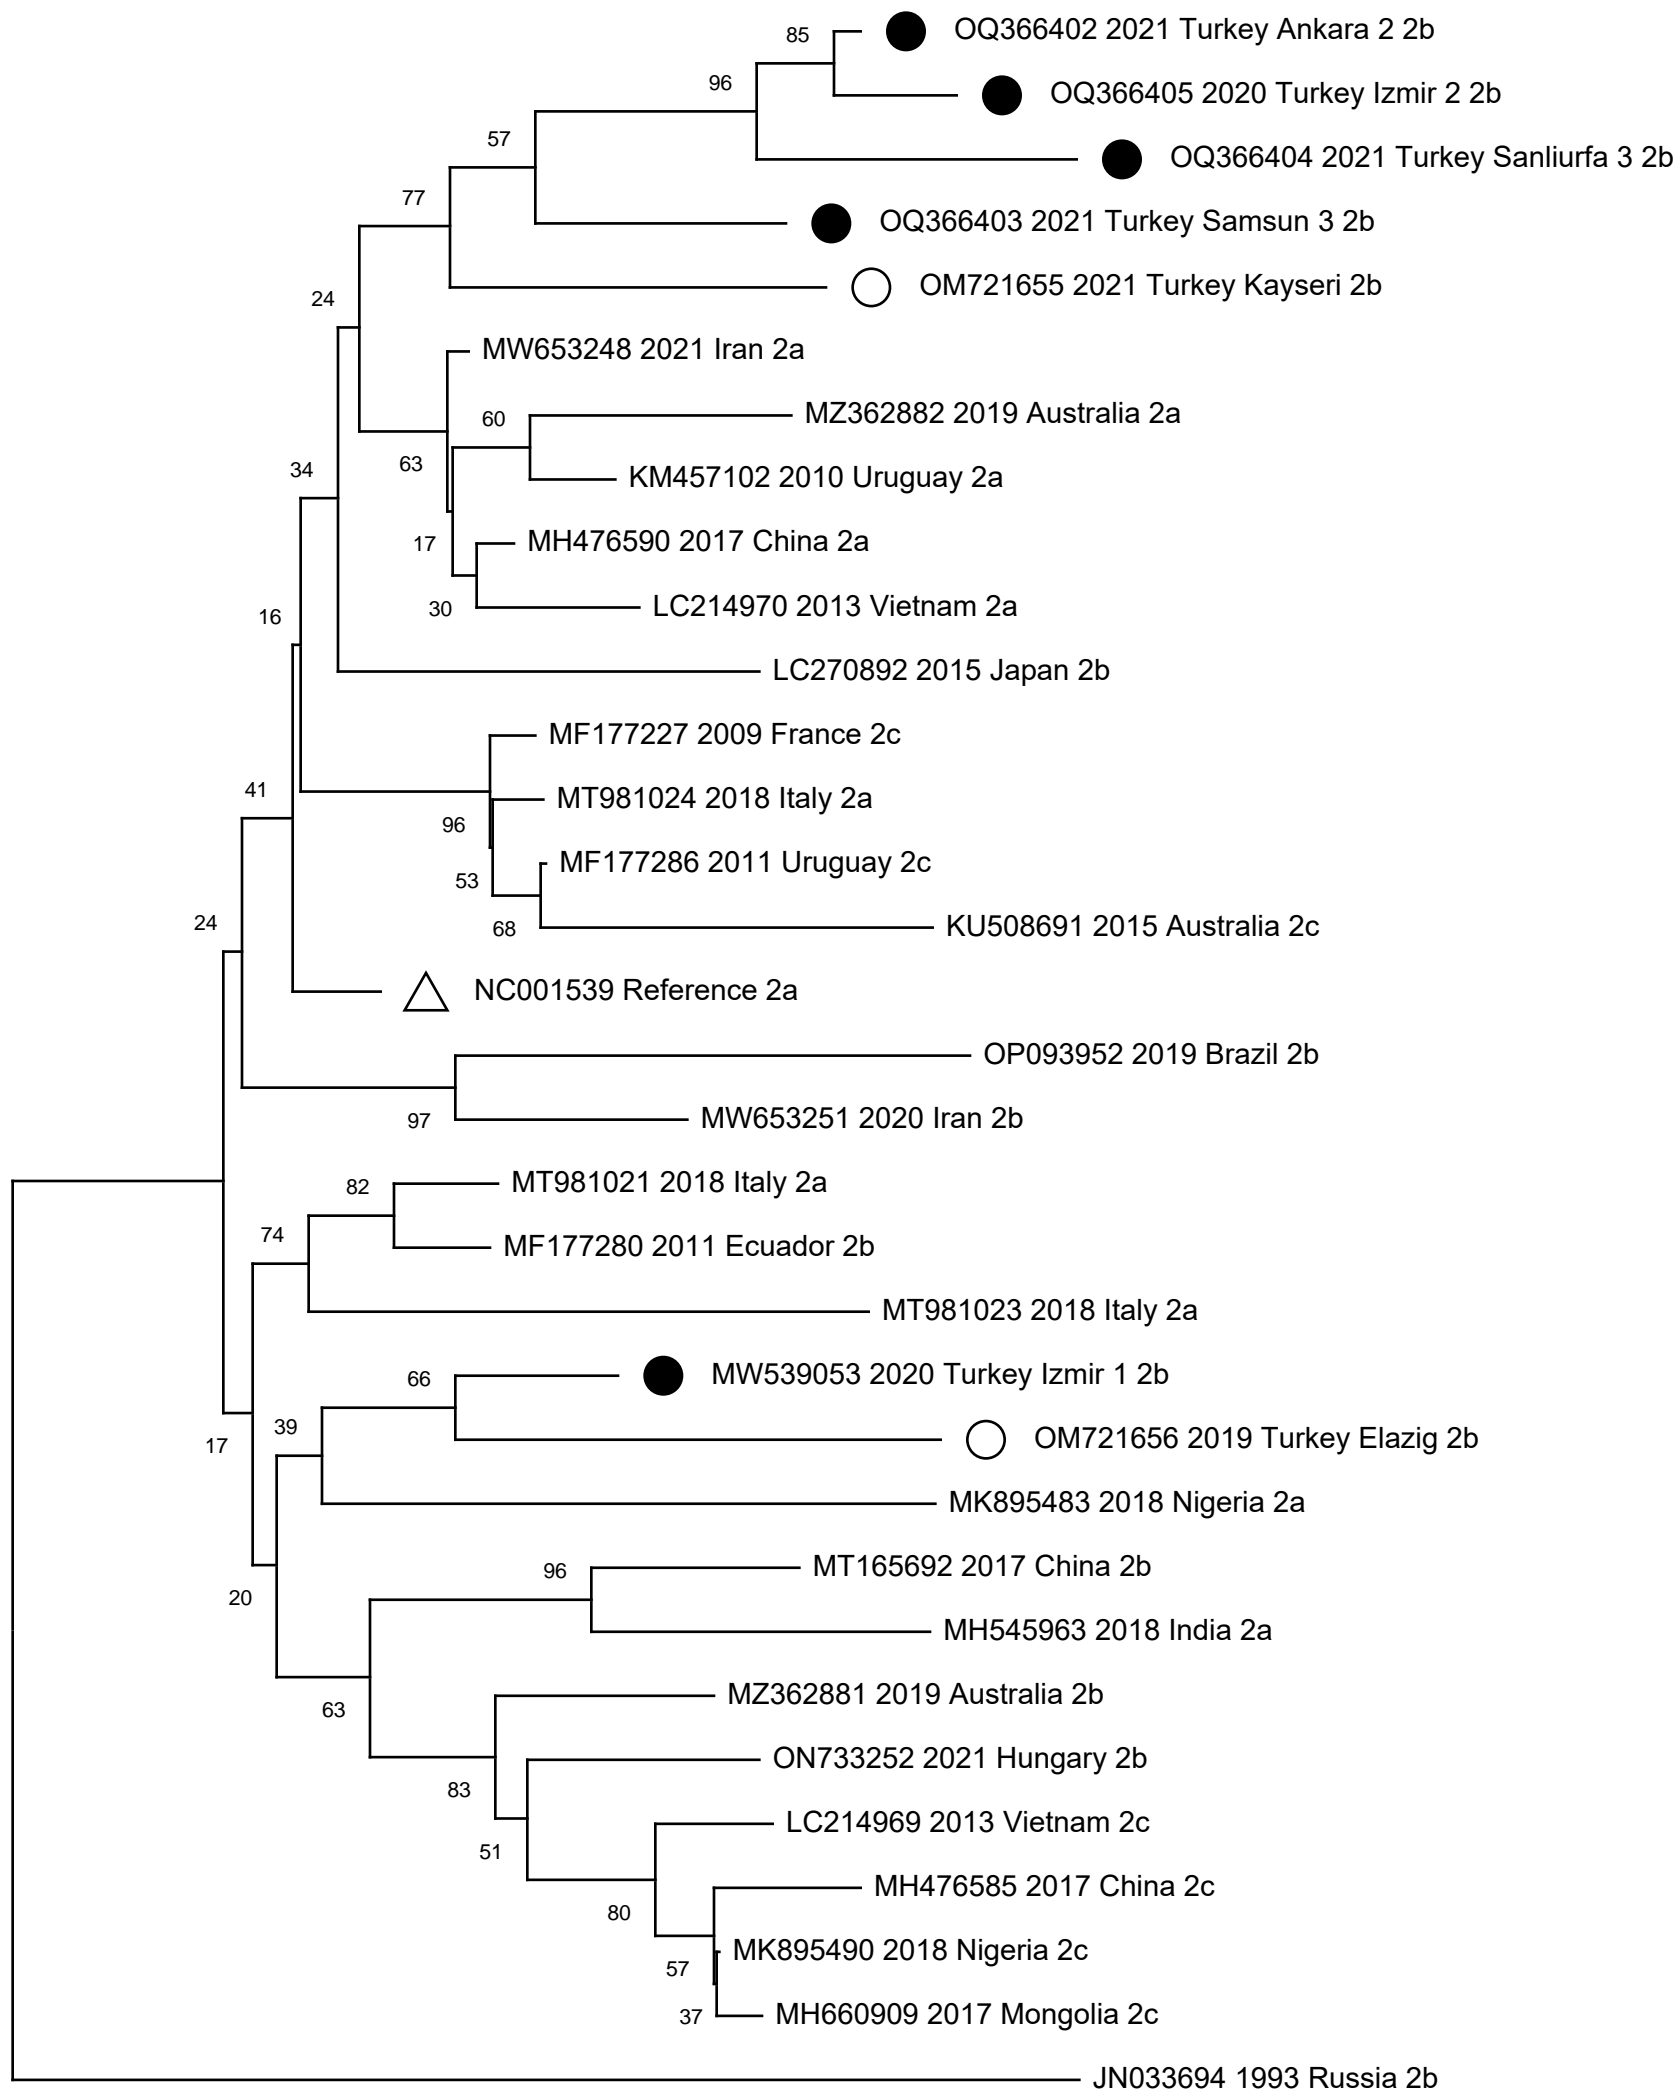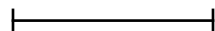

0.0020

Supplement: s1 [file s1]

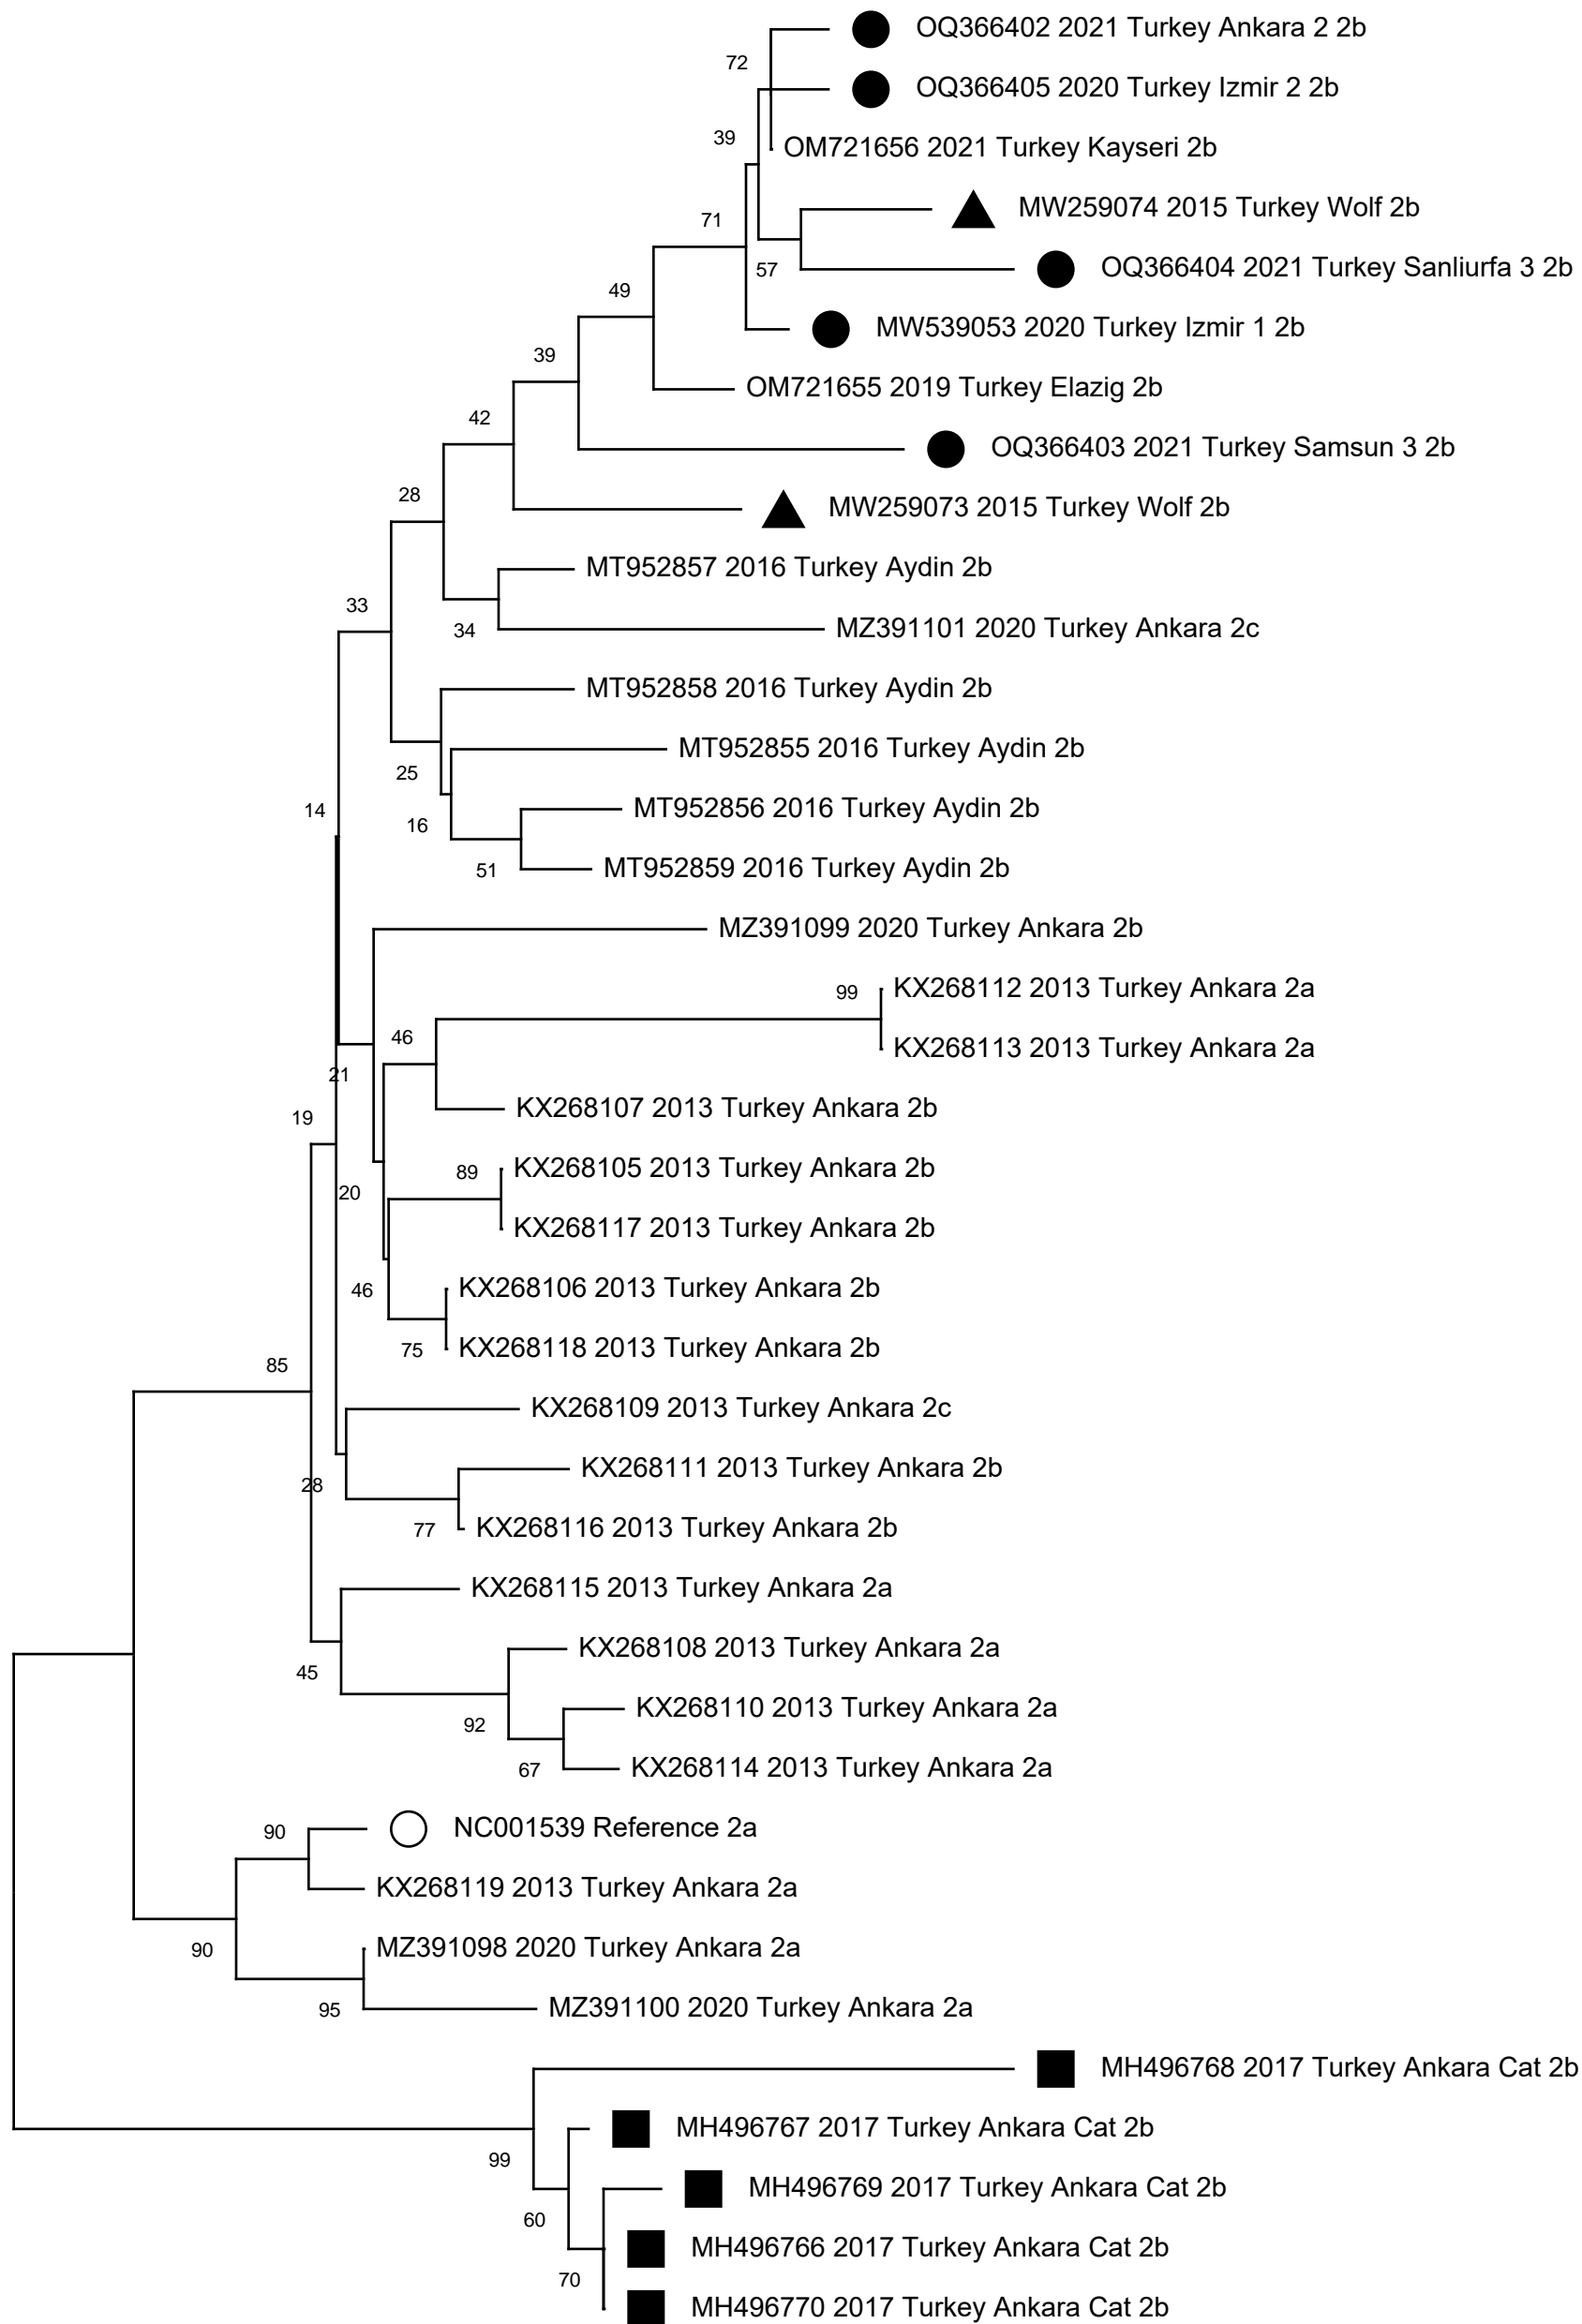

0.0020

Supplement: s1 [file s1]
